# Supplementary material for: Emerging Contaminants in the Effluent of Wastewater Should Be Regulated: Which and to What Extent?
Source: Toxics. 2024 Apr 24;12(5):309. doi: 10.3390/toxics12050309 (PMC11125804; doi:10.3390/toxics12050309)
Supplement: Supplementary file 1 [file toxics-12-00309-s001.zip › SI tables.xlsx]

## Sheet: Index
Emerging contaminants in the effluent of wastewater should be regulated： Which and to what extent? Weiwei Yang1, Qingwei Bu1,*, Qianhui Shi1, Ruiqing Zhao1, Haitao Huang1, Lei Yang2, Jianfeng Tang3, Yuning Ma4,* 1 School of Chemical & Environmental Engineering, China University of Mining & Technology-Beijing, Beijing 100083, P.R. China 2 State Key Laboratory of Urban and Regional Ecology, Researc…
Table S1	Concentration levels of PHACs in the effluent of WWTPs in China.
Table S2	Concentration levels of EDCs in the effluent of WWTPs in China.
Table S3	Database of emerging contaminants detected in the effluent of WWTPs in China.
Table S4	The selection criteria for AF in the derivation of PNEC.
Table S5	PNEC of PHACs.
Table S6	PNEC of EDCs.
Table S7	Chronic toxicity data of Carbamazepine on freshwater organisms.
Table S8	Acute toxicity data of Carbamazepine on freshwater organisms.
Table S9	Chronic toxicity data of Ibuprofen on freshwater organisms.
Table S10	Acute toxicity data of Ibuprofen on freshwater organisms.
Table S11	Chronic toxicity data of Bisphenol on freshwater organisms.
Table S12	Acute toxicity data of Bisphenol on freshwater organisms.
Table S13	SSD fitting results of carbamazepine, ibuprofen and bisphenol-A.

## Sheet: Table S1
Table S1 Concentration levels of PHACs in the effluent of WWTPs in China.
Province	Concentration (ng/L)
	Sulfadimethoxypyrimidine	Sulfamethoxazole	Sulfadiazine	Sulfamono methoxine	Sulfapyridine	Sulfadimethoxine	Sulfisoxazole	sulfamerazine	Sulfathiazole	Sulfamethoxypyridazine	Sulfisomidine	Sulfaquinoxaline	Sulfacetamide	Sulfachloropyridazine	Sulfamethizole	Trimethoprim	Norfloxacin	Ofloxacin	Ciprofloxacin	Enrofloxacin	Enoxacin	Fleroxacin	Lomefloxacin	Sarafloxacin	Danofloxacin	Oxilinic acid	Flumequine	Pefloxacin	Nalidixic acid	Cinoxacin	Danofloxacin mesylate	Sarafloxacin hydrochloride	Difloxacin	Erythromycin	Roxithromycin	Clarithromycin	Azithromycin	Tylosin	Josamycin	Spiramycin	Leucomycin	Tetracycline	Oxytetracycline	Doxycycline	Chlortetracycline	Epi-iso-chlorotetracycline	Tetracycline hydrochloride	Demeclocycline	Minocycline
Hong Kong	<LOD	110±36							<LOD							91±28	364±159	980±240																455±194	120			<LOD				152±59	71±41		<LOD
Hong Kong	<LOD	37±6							<LOD							68±4	77±0.4	708±274																358±24	<LOD			<LOD				<LOD	31±5		<LOD
Hong Kong	<LOD	8±3							<LOD							68±8	33	202±134																533±24	142±5			<LOD				14±3	<LOD		<LOD
Hong Kong	<LOD	55±16							<LOD							331±162	1500±148	5700±3070																2820±2140	225±101			<LOD				1060±268	132±88		<LOD
Hong Kong	<LOD	155±174							<LOD							330±171	2510±1690	6840±1330																2980±240	428±169			<LOD				1400±28	68±17		<LOD
Hong Kong	<LOD	100±61							<LOD							386±55	1270±594	6320±721																2770±1660	299±49			<LOD				1150±85	528±445		<LOD
Hong Kong	<LOD	67±2							<LOD							445±29	2290±311	4400±354																1970±113	318±40			<LOD				736±75	125±29		<LOD
Guizhou	64.23±14.37	1065.77±63.47		155.36±23.33		19.54±4.31						44.97±8.77					44.04±12.29	58.64±17.37	54.67±10.39	73.21±14.22				8.37±2.20										148.21±14.35	329.55±31.67	5.39±0.77	83.12±22.84					20.52±4.31	24.12±4.68	12.27±2.93	17.76±5.89
Fujian		0.805	2.95			0									23.1		78.1	129	8.71	0				0.41	0.74																	18	22.7		4.43
Guangdong	6.06±0.71	22.1±0.48	＜LOQ	＜LOQ	11.3±0.37											13.2±0.41	20.1±0.34	32.3±0.55	11.4±0.23															3200±159	36.7±1.77	28.8±1.40						＜LOQ	51.2±29.9
Guangdong	8.31±0.73	49.4±3.92	＜LOQ	＜LOQ	20.2±0.76											12.1±0.76	7.78±0.02	61.2±0.85	7.62±1.06															4530±43.0	53.4±4.57	41.4±0.54						＜LOQ	＜LOQ
Guangdong	＜LOQ	13.0±1.06	＜LOQ	＜LOQ	4.26±0.50											3.70±0.11	11.2±1.05	13.3±0.85	6.04±0.11															2240±76.7	41.5±4.21	24.1±1.99						＜LOQ	＜LOQ
Guangdong	6.32±0.43	20.4±0.73	＜LOQ	3.96±1.28	4.73±0.01											12.9±0.61	＜LOQ	42.3±0.95	＜LOQ															1410±9.86	6.97±1.43	13.5±2.05						＜LOQ	＜LOQ
Guangdong	5.75±0.46	52.9±3.01	3.91±0.21	＜LOQ	14.3±0.28											5.94±0.22	17.3±1.53	51.9±4.50	＜LOQ															2060±45.0	17.3±1.66	17.9±0.93						＜LOQ	＜LOQ
Guangdong	33.2±0.41	76.9±3.20	5.73±0.32	＜LOQ	25.5±0.86											8.57±0.19	36.0±3.95	81.1±7.77	＜LOQ															3880±61.4	56.3±1.90	54.0±2.84						＜LOQ	＜LOQ
Guangdong	4.24±0.32	33.8±2.82	＜LOQ	7.21±0.47	8.32±0.28											7.50±0.08	11.6±1.45	32.1±1.95	＜LOQ															4930±147	14.1±1.35	4.79±0.13						＜LOQ	＜LOQ
Guangdong	7.90±0.81	105±2.71	5.52±0.48	＜LOQ	15.9±1.15											42.9±2.94	27.8±1.29	99.2±6.50	28.7±0.42															14400±387	206±6.25	32.3±1.74						187±11.1	280±11.9
Guangdong	4.98±0.25	186±10.8	9.27±0.64	＜LOQ	21.3±0.79											21.5±1.49	23.1±0.99	371±26.3	71.3±3.76															2890±161	148±12.2	15.8±1.14						＜LOQ	＜LOQ
Hunan	11	34	14					ND	ND			ND						29	ND	ND	ND						ND	ND						48	150	120	210	ND				ND	24	ND	ND
Jiangsu	1.76	253.31	25.65			0.02	0.55	0.29	0.13						0.04	74.07	254.98	636.89	14.99	1.49			1.73											286.73	169.56	29.17		0.48				41.6	102.19	1.25
Guangdong		9.7			6.6											6		39.6	7.1															60.3	57	22.7	50.5					22.8	27.4
Tianjin		1.64
Tianjin		83.1
Tianjin		267
Shandong	257.08	93.11	1.56			54.89		16.74		0.06		0.24	1.74	0.16
Beijing	7.1	440	480											330			9.4	150	ND			11	ND											170	140			ND	1.5	ND
Beijing	2.5	220	120											110			36	600	2.5			16	19											51	84			2.8	ND	6.1
Beijing	8.8	460	300											330			56	1200	9.5			ND	ND											270	120			ND	1	ND
Beijing	3.1	340	270											130			45	720	15			ND	1.9											120	54			1.2	1	3.8
Beijing	4	250	240											240			130	580	23			11	28											300	190			1.9	1	7.3
Beijing	6.4	380	560											260			200	920	55			38	140											260	240			ND	ND	ND
Beijing	11	300	330											300			70	750	21			ND	12											270	150			3	2	32
Beijing	1.6	130	140											36			75	380	31			ND	ND											64	360			ND	ND	ND
Beijing	202	100.4	151.2			0.864											204	164.4	104.6															33.8	12.5					3.6
Beijing			16.7														6.7	31.9																8.8		9.7
Beijing			2.7														18.5	16																20		25.9
Beijing			4														16.2	105.2																19.6		138.8
Beijing			ND														ND	1.9																17.2		89
Beijing			2.1														ND	2.3																11.8		49
Shandong		395±26															<10																		<20
Shandong		678±84															57±7																		50±9
Shandong		435±39															84±13																		47±8
Liaoning	1.6	174.6	12.1	0.6	21.8	ND			ND					ND			59.7	268	5.2	ND	19.9													50.8		12.2	20.9						62.3	ND
Shandong	3969.4	1.3	<LOQ						4.8	9345.5	1322.8	2		2.6			54.1	<LOQ	334.9	<LOQ	1598.7		<LOQ	2683.7	2.8	450.3	2	<LOQ	0.0196	1.425				0.7	0.1	0.6		0.02			0.09	<LOQ	<LOQ			<LOQ		<LOQ	<LOQ
Shandong	7676.8	<LOQ	<LOQ						6.8								70.2	<LOQ	445.2	<LOQ	4894.3		3.4	510.7	<LOQ	795.2	0.4	<LOQ	<LOQ	1.9225				0.6	0.09	0.3		0.03			0.08	<LOQ	<LOQ			<LOQ		<LOQ	<LOQ
Shandong	ND	2.02	ND	ND														11.74																									ND		ND		ND
Guizhou	2.02	166.44	3.5	ND														286.6																									ND		ND		ND
Hebei	ND-860	ND-1230	ND-820		ND-960	ND		ND-2000	ND-1360
Hebei	ND-1350	ND-1880	ND-950		ND-1030	ND-2980		ND-2800	ND-1830
Gansu	170		30	ND	1200	110		110	ND								670	9780	ND
Gansu	160		220	230	1100	60		170	ND								600	8700	ND
Shanghai	ND	5.8-11.5		ND	35.9-50.2													144.3-99.9
Chongqing		1147.90±65.11	155.03±25.61					39.90±6.52									30.40±3.80	57.90±18.41																153.01±16.50	347.52±35.41		81.52±23.81
Fujian																	124	142		1.28											0.892	0.0997	ND										29.8				12.9
Shanghai
Shanghai
Shanghai
Shanghai
Shanghai
Guangdong
Guangdong
Anhui
Anhui
Jiangsu
Jiangsu
Jiangsu
Guangdong
Heilongjiang
Heilongjiang
Beijing
Beijing
Beijing
Beijing
Beijing
Beijing
Beijing
Beijing
Guangdong
Guangdong
Guangdong
Guangdong
Guangdong
Guangdong
Shanghai
References:
[1]	Leung, H.W.; Minh, T.B.; Murphy, M.B.; Lam, J.C.W.; So, M.K.; Martin, M.; Lam, P.K.S.; Richardson, B.J. Distribution, Fate and Risk Assessment of Antibiotics in Sewage Treatment Plants in Hong Kong, South China. Environment International 2012, 42, 1–9, doi:10.1016/j.envint.2011.03.004.
[2]	Hu, J.; Zhou, J.; Zhou, S.; Wu, P.; Tsang, Y.F. Occurrence and Fate of Antibiotics in a Wastewater Treatment Plant and Their Biological Effects on Receiving Waters in Guizhou. Process Safety and Environmental Protection 2018, 113, 483–490, doi:10.1016/j.psep.2017.12.003.
[3]	Ashfaq, M.; Li, Y.; Wang, Y.; Chen, W.; Wang, H.; Chen, X.; Wu, W.; Huang, Z.; Yu, C.-P.; Sun, Q. Occurrence, Fate, and Mass Balance of Different Classes of Pharmaceuticals and Personal Care Products in an Anaerobic-Anoxic-Oxic Wastewater Treatment Plant in Xiamen, China. Water Research 2017, 123, 655–667, doi:10.1016/j.watres.2017.07.014.
[4]	Yang, Y.-Y.; Liu, W.-R.; Liu, Y.-S.; Zhao, J.-L.; Zhang, Q.-Q.; Zhang, M.; Zhang, J.-N.; Jiang, Y.-X.; Zhang, L.-J.; Ying, G.-G. Suitability of Pharmaceuticals and Personal Care Products (PPCPs) and Artificial Sweeteners (ASs) as Wastewater Indicators in the Pearl River Delta, South China. Science of The Total Environment 2017, 590–591, 611–619, doi:10.1016/j.scitotenv.2017.03.001.
[5]	Lin, H. Mass Loading and Emission of Thirty-Seven Pharmaceuticals in a Typical Municipal Wastewater Treatment Plant in Hunan Province, Southern China. Ecotoxicology and Environmental Safety 2018, 147,530-536,doi.org/10.1016/j.ecoenv.2017.08.052
[6]	Zhou, Y.; Meng, J.; Zhang, M.; Chen, S.; He, B.; Zhao, H.; Li, Q.; Zhang, S.; Wang, T. Which Type of Pollutants Need to Be Controlled with Priority in Wastewater Treatment Plants: Traditional or Emerging Pollutants? Environment International 2019, 131, 104982, doi:10.1016/j.envint.2019.104982.
[7]	Chen, L.; Fu, W.; Tan, Y.; Zhang, X. Emerging Organic Contaminants and Odorous Compounds in Secondary Effluent Wastewater: Identification and Advanced Treatment. Journal of Hazardous Materials 2021, 408, 124817, doi:10.1016/j.jhazmat.2020.124817.
[8]	Yin Zheyun, Min Lujuan, Jin Litao, Wang Fei, Sun Hongwen. HPLC-MS/MS determination of eight PPCPs in sewage and sludge from three types of sewage treatment plants[J]. Environmental Chemistry, 2018, 37(8): 1720-1727. doi: 10.7524/j.issn.0254-6108.2017110803
[9]	Shao T H, Ben W W, Su D, et al. Quantitative determination of typical pharmaceuticals and their metabolites in municipal wastewater treatment plants. Acta Scientiae Circumstantiae, 2020, 40(6): 2136-2141. doi:10.13671/j.hjkxxb.2020.0011.
[10]	Zhao, B.; Liu, Y.; Dong, W.; Li, M.; Lu, S.; Wang, W.; Fan, Y. Occurrence and Fate of Ten Sulfonamide Antibiotics in Typical Wastewater Treatment Plants in the City of Jinan of Northeastern China. DWT 2020, 206, 340–348, doi:10.5004/dwt.2020.26346.
[11]	Gao, L.; Shi, Y.; Li, W.; Niu, H.; Liu, J.; Cai, Y. Occurrence of Antibiotics in Eight Sewage Treatment Plants in Beijing, China. Chemosphere 2012, 86, 665–671, doi:10.1016/j.chemosphere.2011.11.019.
[12]	Chunhui, Z.; Liangliang, W.; Xiangyu, G.; Xudan, H. Antibiotics in WWTP Discharge into the Chaobai River, Beijing. Archives of Environmental Protection 2016, 42, 48–57, doi:10.1515/aep-2016-0036.
[13]	Wang L, Zhu D, Cao Y X, et al. Seasonal changes and ecological risk assessment of pharmaceutical and personal care products in the effluents of wastewater treatment plants in Beijing. Acta Scientiae Circumstantiae, 2021, 41(7): 2922-2932, doi:10.13671/j.hjkxxb.2020.0491.
[14]	Du, J.; Fan, Y.; Qian, X. Occurrence and Behavior of Pharmaceuticals in Sewage Treatment Plants in Eastern China. Front. Environ. Sci. Eng. 2015, 9, 725–730, doi:10.1007/s11783-014-0661-1.
[15]	Zhang, X.; Zhao, H.; Du, J.; Qu, Y.; Shen, C.; Tan, F.; Chen, J.; Quan, X. Occurrence, Removal, and Risk Assessment of Antibiotics in 12 Wastewater Treatment Plants from Dalian, China. Environ Sci Pollut Res 2017, 24, 16478–16487, doi:10.1007/s11356-017-9296-7.
[16]	Wang, K.; Zhuang, T.; Su, Z.; Chi, M.; Wang, H. Antibiotic Residues in Wastewaters from Sewage Treatment Plants and Pharmaceutical Industries: Occurrence, Removal and Environmental Impacts. Science of The Total Environment 2021, 788, 147811, doi:10.1016/j.scitotenv.2021.147811.
[17]	YANG Zhao, LI Jiang, ZHANG Sheng-hu, XIANG Fu-liang, TANG Tao-tao, YANG Ya-nan. Pollution Level and Ecological Risk of Typical Antibiotics in Guiyang Wastewater Treatment Plants[J]. Environmental Science, 2019, 40, 3249–3256, doi:10.13227/j.hjkx.201812025.
[18]	LI Qingxue, LIU Hanyu, LIU Juan, JIA Liying, WANG Qing. Occurrence and fate of sulfonamide and β-lactam antibiotics in wastewater treatment plants in Handan[J]. Environmental Chemistry, 2018, 37(8): 1738-1745. doi: 10.7524/j.issn.0254-6108.2017122704
[19]	GAO J H, WANG Z W, ZHANG H Y, et al.Occurrence and the fate of typical antibiotics in sewage treatment plants in Lanzhou. Acta Scientiae Circumstantiae, 2016, 36, 3765–3773, doi:10.13671/j.hjkxxb.2016.0074.
[20]	Ke Runhui, Jiang Yulin, Huang Qinghui, Chen Ling. Investigative Screening of Pharmaceuticals in a Municipal Wastewater Treatment Plant in Shanghai[J]. Asian Journal of Ecotoxicology, 2014, 9(6): 1146-1155. doi: 10.7524/AJE.1673-5897-20140224001
[21]	GAN Xiu-mei, YAN Qing, GAO Xu, ZHANG Yi-xin, ZI Cheng-fang, PENG Xu-ya, GUO Jin-song. Occurrence and Fate of Typical Antibiotics in a Wastewater Treatment Plant in Southwest China[J]. Environmental Science, 2014, 35, 1817–1823, doi:10.13227/j.hjkx.2014.05.026.
[22]	Wang, Y.; Li, Y.; Hu, A.; Rashid, A.; Ashfaq, M.; Wang, Y.; Wang, H.; Luo, H.; Yu, C.-P.; Sun, Q. Monitoring, Mass Balance and Fate of Pharmaceuticals and Personal Care Products in Seven Wastewater Treatment Plants in Xiamen City, China. Journal of Hazardous Materials 2018, 354, 81–90, doi:10.1016/j.jhazmat.2018.04.064.
[23]	Wu, M.; Xiang, J.; Que, C.; Chen, F.; Xu, G. Occurrence and Fate of Psychiatric Pharmaceuticals in the Urban Water System of Shanghai, China. Chemosphere 2015, 138, 486–493, doi:10.1016/j.chemosphere.2015.07.002.
[24]	Tang, Y.; Guo, L.; Hong, C.; Bing, Y.; Xu, Z. Seasonal Occurrence, Removal and Risk Assessment of 10 Pharmaceuticals in 2 Sewage Treatment Plants of Guangdong, China. Environmental Technology 2019, 40, 458–469, doi:10.1080/09593330.2017.1397758.
[25]	Li, Y.; Niu, X.; Yao, C.; Yang, W.; Lu, G. Distribution, Removal, and Risk Assessment of Pharmaceuticals and Their Metabolites in Five Sewage Plants. IJERPH 2019, 16, 4729, doi:10.3390/ijerph16234729.
[26]	YE Pu, YOU Wen-dan, YANG Bin, CHEN Yang, WANG Li-gao, ZHAO Jian-liang, YING Guang-guo. Pollution Characteristics and Removal of Typical Pharmaceuticals in Hospital Wastewater and Municipal Wastewater Treatment Plants[J]. Environmental Science, 2021, 42, 2928–2936, doi:10.13227/j.hjkx.202011001.
[27]	Li, W.-L.; Zhang, Z.-F.; Ma, W.-L.; Liu, L.-Y.; Song, W.-W.; Li, Y.-F. An Evaluation on the Intra-Day Dynamics, Seasonal Variations and Removal of Selected Pharmaceuticals and Personal Care Products from Urban Wastewater Treatment Plants. Science of the Total Environment 2018,640-641,1139-1147,doi.org/10.1016/j.scitotenv.2018.05.362
[28]	Duan, L.; Zhang, Y.; Wang, B.; Deng, S.; Huang, J.; Wang, Y.; Yu, G. Occurrence, Elimination, Enantiomeric Distribution and Intra-Day Variations of Chiral Pharmaceuticals in Major Wastewater Treatment Plants in Beijing, China. Environmental Pollution 2018, 239, 473–482, doi:10.1016/j.envpol.2018.04.014.
[29]	Yao, L.; Chen, Z.-Y.; Dou, W.-Y.; Yao, Z.-K.; Duan, X.-C.; Chen, Z.-F.; Zhang, L.-J.; Nong, Y.-J.; Zhao, J.-L.; Ying, G.-G. Occurrence, Removal and Mass Loads of Antiviral Drugs in Seven Wastewater Treatment Plants with Various Treatment Processes. Water Research 2021, 207, 117803, doi:10.1016/j.watres.2021.117803.
[truncated: 75 more columns]

## Sheet: Table S2
Table S2 Concentration levels of EDCs in the effluent of WWTPs in China.
Province	Concentration (ng/L)																year	Reference
	Triclosan	Nonylphenol	Triclocarban	Bisphenol-A	Octyl phenol	Triclosan Methyl Ether	Chloroform	β-Estradiol	Estriol	Estrone	Ethinylestradiol	Diethylstilbestrol	p-t-Octylphenol	p-tert-Butylphenol	Norethindrone	Estradiol Valerate
Guangdong	50	265.4	58	104.6													2017	[1]
Fujian	96.8		0.457			19.9	6.56	75.3	461	156							2018	[2]
Jiangsu				57				97~112	0	9~21	402~549	164~179					2013	[3]
Guangdong		1346.75~7513.57						ND~50.03		ND~31.39	4.72~35.03	ND~7.01					2020	[4]
Guangdong		245.5~10277.3		47.3~2478.5	11.7~4896.4			0	0~28.4	2.5~9.5							2021	[5]
Zhejiang		ND~263.7		ND~137.4				ND~11.8	ND~5.9	ND~25.6	ND~69.1						2013	[6]
Fujian				16.8~1100													2017	[7]
Guangxi		16.5~19.2		14.3~42.0				ND~7.8	ND~10.5	ND~4.7	ND~8.1	81.1					2022	[8]
Hong Kong		176.3~2916.1		44.7~1035.3													2014	[9]
Shanghai		219~1140		24.3~68.4									3.03~80.4	ND~137	ND~1.68		2016	[10]
Guangdong		93		88					ND	26	5.6						2014	[11]
Guangdong								2.8~29.1		1.1~21	ND~9.9						2014	[12]
Shanghai								47.7~80.1									2012	[13]
Beijing									ND~1200	0.7~1200	ND~4100					ND~11.2	2012	[14]
References:
[1]	Wang Kaiyan;Huang Zhihua; Li Zhaohui; Ye Xiangdong; Yang Shewei; Huang Zhenxiong. Pollution characteristics and ecological risk assessment of typical EDCs and PPCPs in a municipal sewage treatment plant in Huizhou.Water & Wastewater, 2017, 53, 152–154, doi:10.13789/j.cnki.wwe1964.2017.0460.
[2]	Ashfaq, M.; Li, Y.; Wang, Y.; Qin, D.; Rehman, M.S.U.; Rashid, A.; Yu, C.-P.; Sun, Q. Monitoring and Mass Balance Analysis of Endocrine Disrupting Compounds and Their Transformation Products in an Anaerobic-Anoxic-Oxic Wastewater Treatment System in Xiamen, China. Chemosphere 2018, 204, 170–177, doi:10.1016/j.chemosphere.2018.04.028.
[3]	He, Y.; Chen, W.; Zheng, X.; Wang, X.; Huang, X. Fate and Removal of Typical Pharmaceuticals and Personal Care Products by Three Different Treatment Processes. Science of The Total Environment 2013, 447, 248–254, doi:10.1016/j.scitotenv.2013.01.009.
[4]	Jiang, R.; Liu, J.; Huang, B.; Wang, X.; Luan, T.; Yuan, K. Assessment of the Potential Ecological Risk of Residual Endocrine-Disrupting Chemicals from Wastewater Treatment Plants. Science of The Total Environment 2020, 714, 136689, doi:10.1016/j.scitotenv.2020.136689.
[5]	Liang, H.; Gong, J.; Zhou, K.; Deng, L.; Chen, J.; Guo, L.; Jiang, M.; Lin, J.; Tang, H.; Liu, X. Removal Efficiencies and Risk Assessment of Endocrine-Disrupting Chemicals at Two Wastewater Treatment Plants in South China. Ecotoxicology and Environmental Safety 2021, 225, 112758, doi:10.1016/j.ecoenv.2021.112758.
[6]	Qiang, Z.; Dong, H.; Zhu, B.; Qu, J.; Nie, Y. A Comparison of Various Rural Wastewater Treatment Processes for the Removal of Endocrine-Disrupting Chemicals (EDCs). Chemosphere 2013, 92, 986–992, doi:10.1016/j.chemosphere.2013.03.019.
[7]	Sun, Q.; Wang, Y.; Li, Y.; Ashfaq, M.; Dai, L.; Xie, X.; Yu, C.-P. Fate and Mass Balance of Bisphenol Analogues in Wastewater Treatment Plants in Xiamen City, China. Environmental Pollution 2017, 225, 542–549, doi:10.1016/j.envpol.2017.03.018.
[8]	Wu, L.; Lu, C.; Huang, N.; Zhong, M.; Teng, Y.; Tian, Y.; Ye, K.; Liang, L.; Hu, Z. Exploration of the Effect of Simultaneous Removal of EDCs in the Treatment Process of Different Types of Wastewater. Water Science and Technology 2022, 87, 436–453, doi:10.2166/wst.2022.429.
[9]	Xu, E.G.B.; Liu, S.; Ying, G.-G.; Zheng, G.J.S.; Lee, J.H.W.; Leung, K.M.Y. The Occurrence and Ecological Risks of Endocrine Disrupting Chemicals in Sewage Effluents from Three Different Sewage Treatment Plants, and in Natural Seawater from a Marine Reserve of Hong Kong. Marine Pollution Bulletin 2014, 85, 352–362, doi:10.1016/j.marpolbul.2014.02.029.
[10]	Xu, G.; Ma, S.; Tang, L.; Sun, R.; Xiang, J.; Xu, B.; Bao, Y.; Wu, M. Occurrence, Fate, and Risk Assessment of Selected Endocrine Disrupting Chemicals in Wastewater Treatment Plants and Receiving River of Shanghai, China. Environ Sci Pollut Res 2016, 23, 25442–25450, doi:10.1007/s11356-016-7669-y.
[11]	Xu, W.; Yan, W.; Huang, W.; Miao, L.; Zhong, L. Endocrine-Disrupting Chemicals in the Pearl River Delta and Coastal Environment: Sources, Transfer, and Implications. Environ Geochem Health 2014, 36, 1095–1104, doi:10.1007/s10653-014-9618-3.
[12]	Xu, Y.; Xu, N.; Llewellyn, N.R.; Tao, H. Occurrence and Removal of Free and Conjugated Estrogens in Wastewater and Sludge in Five Sewage Treatment Plants. Environ. Sci.: Processes Impacts 2014, 16, 262–270, doi:10.1039/C3EM00199G.
[13]	Yang, M.; Wang, K.; Shen, Y.; Wu, M. Evaluation of Estrogenic Activity in Surface Water and Municipal Wastewater in Shanghai, China. Bull Environ Contam Toxicol 2011, 87, 215–219, doi:10.1007/s00128-011-0334-8.
[14]	Zhou, Y.; Zha, J.; Xu, Y.; Lei, B.; Wang, Z. Occurrences of Six Steroid Estrogens from Different Effluents in Beijing, China. Environ Monit Assess 2012, 184, 1719–1729, doi:10.1007/s10661-011-2073-z.

## Sheet: Table S3
	Table S3 Database of emerging contaminants detected in the effluent of WWTPs in China.
No.	PHACS				No.	EDCs
	CAS	Chemical Name	Molecular Formula	Molecular Weight		CAS	Chemical Name	Molecular Formula	Molecular Weight
1	57-68-1	Sulfadimethoxypyrimidine	C12H14N4O2S	278.33	1	3380-34-5	Triclosan	C12H7Cl3O2	289.54
2	723-46-6	Sulfamethoxazole	C10H11N3O3S	253.28	2	25154-52-3	Nonylphenol	C15H24O	220.35
3	68-35-9	Sulfadiazine	C10H10N4O2S	250.28	3	101-20-2	Triclocarban	C13H9Cl3N2O	315.58
4	1220-83-3	Sulfamono methoxine	C11H12N4O3S	280.3	4	80-05-7	Bisphenol-A	C15H16O2	228.29
5	144-83-2	Sulfapyridine	C11H11N3O2S	249.29	5	27193-28-8	Octylphenol	C14H22O	206.32
6	122-11-2	Sulfadimethoxine	C12H14N4O4S	310.33	6	4640-01-1	Triclosan Methyl Ether	C13H9Cl3O2	303.27
7	127-69-5	Sulfisoxazole	C11H13N3O3S	267.3	7	67-66-3	Chloroform	CHCl3	119.38
8	127-79-7	Sulfamerazine	C11H12N4O2S	264.3	8	50-28-2	β-Estradiol	C18H24O2	272.39
9	72-14-0	Sulfathiazole	C9H9N3O2S2	255.32	9	50-27-1	Estriol	C18H24O3	288.38
10	80-35-3	Sulfamethoxypyridazine	C11H12N4O3S	280.3	10	53-16-7	Estrone	C18H22O2	270.37
11	515-64-0	Sulfisomidine	C12H14N4O2S	278.33	11	57-63-6	Ethinylestradiol	C20H24O2	296.41
12	59-40-5	Sulfaquinoxaline	C14H12N4O2S	300.34	12	56-53-1	Diethylstilbestrol	C18H20O2	268.35
13	144-80-9	Sulfacetamide	C8H10N2O3S	214.24	13	140-66-9	p-t-Octylphenol	C14H22O	286.41
14	80-32-0	Sulfachloropyridazine	C10H9ClN4O2S	284.72	14	98-54-4	p-tert-Butylphenol	C10H14O	—
15	144-82-1	Sulfamethizole	C9H10N4O2S2	270.33	15	68-22-4	Norethindrone	C20H26O2	136.19
16	738-70-5	Trimethoprim	C14H18N4O3	290.32	16	979-32-8	Estradiol Valerate	C23H32O3	268.35
17	70458-96-7	Norfloxacin	C16H18FN3O3	319.33
18	82419-36-1	Ofloxacin	C18H20FN3O4	361.37
19	85721-33-1	Ciprofloxacin	C17H18FN3O3	331.34
20	93106-60-6	Enrofloxacin	C19H22FN3O3	359.39
21	74011-58-8	Enoxacin	C15H17FN4O3	320.32
22	79660-72-3	Fleroxacin	C17H18F3N3O3	369.34
23	98079-51-7	Lomefloxacin	C17H19F2N3O3	351.35
24	98105-99-8	Sarafloxacin	C20H17F2N3O3	385.36
25	98106-17-3	Difloxacin	C21H19F2N3O3	399.39
26	112398-08-0	Danofloxacin	C19H20FN3O3	357.38
27	14698-29-4	Oxilinic acid	C13H11NO5	261.23
28	42835-25-6	Flumequine	C14H12FNO3	261.25
29	70458-92-3	Pefloxacin	C17H20FN3O3	333.36
30	389-08-2	Nalidixic acid	C12H12N2O3	232.24
31	28657-80-9	Cinoxacin	C12H10N2O5	262.22
32	119478-55-6	Danofloxacin mesylate	C20H24FN3O6S	453.48
33	91296-87-6	Sarafloxacin hydrochloride	C20H18ClF2N3O3	421.83
34	114-07-8	Erythromycin	C37H67NO13	733.93
35	80214-83-1	Roxithromycin	C41H76N2O15	837.05
36	1401-69-0	Tylosin	C46H77NO17	916.1
37	16846-24-5	Josamycin	C42H69NO15	827.99
38	8025-81-8	Spiramycin	C43H74N2O14	843.05
39	81103-11-9	Clarithromycin	C38H69NO13	747.95
40	83905-01-5	Azithromycin	C38H72N2O12	748.98
41	78897-52-6	Leucomycin	C41H69NO14	800
42	60-54-8	Tetracycline	C22H24N2O8	444.43
43	79-57-2	Oxytetracycline	C22H24N2O9	460.43
44	564-25-0	Doxycycline	C22H24N2O8	444.43
45	57-62-5	Chlortetracycline	C22H23ClN2O8	478.88
46	—	Epi-iso-chlorotetracycline	—	—
47	64-75-5	Tetracycline hydrochloride	C22H25ClN2O8	480.9
48	64-73-3	Demeclocycline	C21H22Cl2N2O8	501.31
49	10118-90-8	Minocycline	C23H27N3O7	457.48
50	15686-71-2	Cephalexin	C16H17N3O4S	347.39
51	26787-78-0	Amoxicillin	C16H19N3O5S	365.4
52	11111-12-9	Cephalosporin	C16H21N3O8S	325
53	25953-19-9	Cefazolin	C14H14N8O4S3	454.51
54	51-05-8	Procaine hydrochloride	C13H21ClN2O2	272.77
55	63527-52-6	Cefotaxime	C16H17N5O7S2	455.47
56	73384-59-5	Ceftriaxone	C18H18N8O7S3	554.58
57	53994-73-3	Cefaclor	C15H14ClN3O4S	367.81
58	73231-34-2	Florfenicol	C12H14Cl2FNO4S	358.21
59	20047-75-0	Clogestone	C21H29ClO3	364.91
60	154-21-2	Lincomycin	C18H34N2O6S	406.54
61	15318-45-3	Thiamphenicol	C12H15Cl2NO5S	356.22
62	53003-10-4	Salinomycin	C42H70O11	751
63	86386-73-4	Fluconazole	C13H12F2N6O	306.27
64	23593-75-1	Clotrimazole	C22H17ClN2	344.84
65	17090-79-8	Monensin	C36H62O11	670.87
66	15307-86-5	Diclofenac	C14H11Cl2NO2	296.15
67	15687-27-1	Ibuprofen	C13H18O2	206.28
68	22204-53-1	Naproxen	C14H14O3	230.26
69	25812-30-0	Gemfibrozil	C15H22O3	250.33
70	61-68-7	Mefenamic acid	C15H15NO2	241.29
71	882-09-7	Clofibric acid	C10H11ClO3	214.65
72	298-46-4	Carbamazepine	C15H12N2O	236.27
73	69-72-7	Salicylic acid	C7H6O3	138.12
74	41859-67-0	Bezafibrate	C19H20ClNO4	361.82
75	53-86-1	Indometacin	C19H16ClNO4	357.79
76	37350-58-6	Metoprolol	C15H25NO3	267.36
77	525-66-6	Propranolol	C16H21NO2	259.34
78	29122-68-7	Atenolol	C14H22N2O3	266.34
79	22071-15-4	Ketoprofen	C16H14O3	254.29
80	58-08-2	Caffeine	C8H10N4O2	194.19
81	15676-16-1	Sulpiride	C15H23N3O4S	341.43
82	93413-69-5	Venlafaxine	C17H27NO2	277.4
83	54910-89-3	Fluoxetine	C17H18F3NO	309.33
84	24219-97-4	Mianserin	C18H20N2	264.36
85	50-48-6	Amitriptyline	C20H23N	277.4
86	1668-19-5	Doxepin	C19H21NO	279.38
87	439-14-5	Diazepam	C16H13ClN2O	284.74
88	1088-11-5	Nordazepam	C15H11ClN2O	270.71
89	604-75-1	Oxazepam	C15H11ClN2O2	286.71
90	29975-16-4	Estazolam	C16H11ClN4	294.74
91	846-50-4	Temazepam	C16H13ClN2O2	300.74
92	28981-97-7	Alprazolam	C17H13ClN4	308.76
93	846-49-1	Lorazepam	C15H10Cl2N2O2	321.16
94	103-90-2	Paracetamol	C8H9NO2	151.16
95	60-80-0	Antipyrine	C11H12N2O	188.23
96	21829-25-4	Nifedipine	C17H18N2O6	346.33
97	37148-27-9	Clenpenterol	C12H18Cl2N2O	277.19
98	50-18-0	Cyclophosphamide	C7H15Cl2N2O2P	261.09
99	938-73-8	2-Ethoxybenzamide	C9H11NO2	165.19
100	31879-05-7	Fenoprofen	C15H14O3	242.27
101	10238-21-8	Glibenclamide	C23H28ClN3O5S	494
102	114798-26-4	Losartan	C22H23ClN6O	422.91
103	28797-61-7	Pirenzepine	C19H21N5O2	351.4
104	479-92-5	Propylantipyrine	C14H18N2O	230.31
105	139755-83-2	Sildenafil	C22H30N6O4S	474.58
106	3930-20-9	Sotalol	C12H20N2O3S	272.36
107	13710-19-5	Tolfenamic acid	C14H12ClNO2	261.7
108	483-63-6	Crotamiton	C13H17NO	203.28
109	5786-21-0	Clozapine	C18H19ClN4	326.82
110	136470-78-5	Abacavir	C14H18N6O	286.33
111	30516-87-1	Azidothymidine	C10H13N5O5	283.24
112	154598-52-4	Efavirenz	C14H9ClF3NO2	315.67
113	129618-40-2	Nevirapine	C15H14N4O	266.3
114	155213-67-5	Ritonavir	C37H48N6O5S2	720.94
115	192725-17-0	Lopinavir	C37H48N4O5	628.81
116	134678-17-4	Lamivudine	C8H11N3O3S	229.26
117	3424-98-4	Telbivudine	C10H14N2O5	242.23
118	142217-69-4	Entecavir	C12H15N5O3	277.28
119	58-55-9	Theophylline	C7H8N4O2	180.16
120	22916-47-8	Miconazole	C18H14Cl4N2O	416.13
121	79156-75-5	Ketoconazole	C26H28Cl2N4O4	531.43
122	58-22-0	Testosterone	C19H28O2	288.43
123	434-22-0	Nandrolone	C18H26O2	274.4
124	84625-61-6	Itraconazole	C35H38Cl2N8O4	705.63

## Sheet: Table S4
Table S4 The selection criteria for AF in the derivation of PNEC.
Number	Toxicity data information	AF
1	LC50 or EC50 data for at least one organism from each of three trophic levels (fish, crayfish, and algae)	1000
2	NOEC data for one organism (fish or crayfish)	100
3	NOEC data representing two organisms from two trophic levels (typically chosen from fish, crayfish, and algae)	50
4	NOEC data representing at least three organisms from three trophic levels (typically chosen from fish, crayfish, and algae)	10
5	NOEC data for three trophic levels (fish, crayfish, and algae) using the Species Sensitivity Distribution (SSD) method	1‒5
6	Field toxicity data or ecosystem modeling	Depend on circumstances

## Sheet: Table S5
Table S5 PNEC of PHACs.
No.	Name	Species	Endpoint	Concentration (mg/L)	AF	PNEC (ng/L)	Reference
1	Sulfadimethoxypyrimidine	Lemna gibba	NOEC	0.3	10	30000	[1]
2	Sulfamethoxazole	Danio rerio	NOEC	0.0028	10	280	[2]
3	Sulfadiazine	Selenastrum capricornutum	NOEC	1	100	10000	[3]
4	Sulfamono methoxine	Oncorhynchus mykiss	NOEC	200	1000	200000	[4]
5	Sulfapyridine	Hydra vulgaris	NOEC	1	100	10000	[5]
6	Sulfadimethoxine	Lemna gibba	NOEC	0.1	100	1000	[1]
7	Sulfisoxazole	Chlorella fusca var. vacuolata	EC50	18.89	1000	18890	[6]
8	sulfamerazine	Chlorella fusca var. vacuolata	EC50	11.9	1000	11900	[6]
9	Sulfathiazole	Chironomus riparius	NOEC	0.01	10	1000	[7]
10	Sulfamethoxypyridazine	Chlorella fusca var. vacuolata	EC50	3.82	1000	3820	[6]
11	Sulfaquinoxaline	Gyrodactylus salaris	—	100	1000	100000	[8]
12	Sulfacetamide	Chlorella vulgaris	EC50	14.71	1000	14710	[9]
13	Sulfachloropyridazine	Chlorella fusca var. vacuolata	EC50	32.25	1000	32250	[6]
14	Trimethoprim	Dreissena polymorpha	NOEC	0.00029	10	29	[10]
15	Norfloxacin	Synechococcus sp.	NOEC	0.0016	10	160	[11]
16	Ofloxacin	Potamopyrgus antipodarum	NOEC	0.0008	10	80	[12]
17	Ciprofloxacin	Potamopyrgus antipodarum	NOEC	0.0004	10	40	[12]
18	Enrofloxacin	Ceriodaphnia dubia	NOEC	1.6	50	32000	[12]
19	Fleroxacin	Euglena gracilis	—	81.15	1000	81150	[13]
20	Lomefloxacin	Lemna gibba	NOEC	0.01	10	1000	[1]
21	Sarafloxacin	Microcystis aeruginosa	EC50	0.009	1000	9	[14]
22	Oxilinic acid	Daphnia magna	NOEC	0.38	50	7600	[15]
23	Flumequine	Daphnia magna	NOEC	0.75	10	75000	[16]
24	Nalidixic acid	Plasmodium falciparum	LC50	4.18	1000	41800	[17]
25	Sarafloxacin hydrochloride	Microcystis aeruginosa	EC50	0.009	1000	9	[14]
26	Erythromycin	Anabaena cylindrica	NOEC	0.0031	10	310	[11]
27	Roxithromycin	Raphidocelis subcapitata	NOEC	0.0066	50	132	[18]
28	Tylosin	Raphidocelis subcapitata	NOEC	0.064	10	6400	[19]
29	Spiramycin	Microcystis aeruginosa	EC50	0.001	1000	1	[14]
30	Clarithromycin	Raphidocelis subcapitata	NOEC	0.04	50	800	[19]
31	Azithromycin	Daphnia magna	NOEC	0.048	100	480	[20]
32	Tetracycline	Gambusia holbrooki	NOEC	5e-06	10	0.5	[21]
33	Oxytetracycline	Anabaena cylindrica	NOEC	0.0031	10	310	[11]
34	Doxycycline	Danio rerio	NOEC	20	100	200000	[22]
35	Chlortetracycline	Lemna gibba	NOEC	0.03	50	600	[1]
36	Tetracycline hydrochloride	Paracheirodon axelrodi	NOEC	2.5	50	5000	[23]
37	Cephalexin	Lemna gibba	NOEC	1	100	10000	[1]
38	Amoxicillin	Hydra vulgaris	NOEC	0.01	10	1000	[24]
39	Procaine hydrochloride	Ptychocheilus oregonensis	—	10	1000	10000	[25]
40	Cefotaxime	Danio rerio	LC25	45.546	1000	45546	[26]
41	Florfenicol	Oreochromis niloticus	NOEC	5	100	50000	[27]
42	Chloramphenicol	Parreysia cylindrica	NOEC	73.81	100	738100	[28]
43	Lincomycin	Lemna gibba	NOEC	0.03	10	3000	[1]
44	Thiamphenicol	Microcystis wesenbergii	NOEC	0.1	100	1000	[11]
45	Fluconazole	Gobiocypris rarus	NOEC	0.2	50	4000	[29]
46	Clotrimazole	Xenopus tropicalis	NOEC	0.0001	10	10	[30]
47	Testosterone	Lymnaea stagnalis	NOEC	3e-07	10	0.03	[31]
48	Diclofenac	Dreissena polymorpha	NOEC	0.000318	10	31.8	[10]
49	Ibuprofen	Oryzias latipes	NOEC	1e-05	10	1	[32]
50	Naproxen	Jordanella floridae	NOEC	0.0001	10	10	[33]
51	Gemfibrozil	Daphnia magna	NOEC	5e-05	10	5	[34]
52	Mefenamic acid	Danio rerio	NOEC	0.005	100	50	[35]
53	Clofibric acid	Oncorhynchus mykiss	LOEC	0.0001	10	10	[36]
54	Carbamazepine	Danio rerio	NOEC	1e-05	10	1	[37]
55	Salicylic acid	Danio rerio	NOEC	0.1	10	10000	[38]
56	Bezafibrate	Danio rerio	NOEC	3.39e-05	100	0.34	[39]
57	Indometacin	Danio rerio	NOEC	0.001	10	100	[40]
58	Metoprolol	Oncorhynchus mykiss	LOEC	0.001	10	100	[41]
59	Propranolol	Oryzias latipes	LOEC	0.001	10	50	[42]
60	Atenolol	Dreissena polymorpha	NOEC	0.001	10	100	[43]
61	Ketoprofen	Salmo salar	NOEC	0.001	100	10	[44]
62	Caffeine	Salmo salar	NOEC	1e-05	10	1	[45]
63	Sulpiride	Dugesia gonocephala	—	1.7071	1000	1700	[46]
64	Venlafaxine	Danio rerio	LOEC	6e-05	100	0.6	[47]
65	Fluoxetine	Danio rerio	LOEC	1e-06	10	0.1	[45]
66	Mianserin	Anodonta cygnea	—	0.300831	1000	3000	[48]
67	Amitriptyline	Streptocephalus proboscideus	LC50	0.776746	1000	776	[49]
68	Diazepam	Danio rerio	NOEC	0.000225	50	4.5	[50]
69	Oxazepam	Radix balthica	NOEC	0.0009	100	9	[51]
70	Temazepam	Pimephales promelas	NOEC	0.00078	100	7.8	[52]
71	Paracetamol	Dreissena polymorpha	NOEC	0.00015	10	15	[10]
72	Antipyrine	Ptychocheilus oregonensis	—	10	1000	10000	[26]
73	Nifedipine	Paspalum vaginatum	LOEC	0.034634	50	692	[53]
74	Cyclophosphamide	Clarias gariepinus	NOEC	0.003	10	300	[54]
75	Glibenclamide	Danio rerio	NOEL	0.0494005	100	494	[27]
76	Tolfenamic acid	Daphnia magna	LC50	7.4	1000	7400	[55]
77	Clozapine	Pimephales promelas	NOEC	0.0179	100	179	[56]
78	Theophylline	Danio rerio	NOEC	96.3889	50	1927800	[57]
79	Ketoconazole	Oryzias latipes	NOEC	0.003	50	60	[58]
References:
[1]	Brain, R.A.; Johnson, D.J.; Richards, S.M.; Sanderson, H.; Sibley, P.K.; Solomon, K.R. Effects of 25 Pharmaceutical Compounds to Lemna Gibba Using a Seven‐day Static‐renewal Test. Environmental Toxicology and Chemistry, 2004,23(2),371-382.
[2]	Kwon, B.; Kho, Y.; Kim, P.-G.; Ji, K. Thyroid Endocrine Disruption in Male Zebrafish Following Exposure to Binary Mixture of Bisphenol AF and Sulfamethoxazole. Environmental Toxicology and Pharmacology 2016, 48, 168–174, doi:10.1016/j.etap.2016.10.018.
[3]	Eguchi, K.; Nagase, H.; Ozawa, M.; Endoh, Y.S.; Goto, K.; Hirata, K.; Miyamoto, K.; Yoshimura, H. Evaluation of Antimicrobial Agents for Veterinary Use in the Ecotoxicity Test Using Microalgae. Chemosphere 2004, 57, 1733–1738, doi:10.1016/j.chemosphere.2004.07.017.
[4]	Bulut, C.; Kubi̇Lay, A.; Hanol Bektaş, Z.; Bi̇Rden, B. Histopathological Effects of Formaldehyde (CH2O) on Rainbow Trout (Oncorhynchus Mykiss Walbaum, 1792). Journal of Limnology and Freshwater Fisheries Research 2015, 1, 43–48, doi:10.17216/limnofish.205732.
[5]	Quinn, B.; Gagné, F.; Blaise, C. An Investigation into the Acute and Chronic Toxicity of Eleven Pharmaceuticals (and Their Solvents) Found in Wastewater Effluent on the Cnidarian, Hydra Attenuata. Science of The Total Environment 2008, 389, 306–314, doi:10.1016/j.scitotenv.2007.08.038.
[6]	Anna Białk-Bielińska; Stefan Stolte; Jürgen Arning; Ute Uebers; Andrea Böschen; Piotr Stepnowski; Marianne Matzke. Ecotoxicity Evaluation of Selected Sulfonamides. 2011, 85(6), 928-933.doi.org/10.1016/j.chemosphere.2011.06.058.
[7]	Park, K.; Kwak, I.-S. Gene Expression of Ribosomal Protein mRNA in Chironomus Riparius: Effects of Endocrine Disruptor Chemicals and Antibiotics. Comparative Biochemistry and Physiology Part C: Toxicology & Pharmacology 2012, 156, 113–120, doi:10.1016/j.cbpc.2012.05.002.
[8]	J Tojo; MT Santamarina; FM Ubeira; J Leiro; ML Sanmartin. Efficacy of antiprotozoal drugs against gyrodactilosis in rainbow trout (Oncorhynchus mykiss)[J]. Bull.Eur.Ass.Fish Pathol.,1993, 13(3), 79.
[9]	Wojciech Baran; Jolanta Sochacka; Władysław Wardas.Toxicity and biodegradability of sulfonamides and products of their photocatalytic degradation in aqueous solutions[J]. Chemosphere, 2006,65(8),1295-1299.Doi:10.1016/j.Chemosphere.2006.04.040.
[10]	Parolini, M.; Pedriali, A.; Binelli, A. Application of a Biomarker Response Index for Ranking the Toxicity of Five Pharmaceutical and Personal Care Products (PPCPs) to the Bivalve Dreissena Polymorpha. Arch Environ Contam Toxicol 2013, 64, 439–447, doi:10.1007/s00244-012-9847-3.
[11]	Ando, T.; Nagase, H.; Eguchi, K.; Hirooka, T.; Nakamura, T.; Miyamoto, K.; Hirata, K. A NOVEL METHOD USING CYANOBACTERIA FOR ECOTOXICITY TEST OF VETERINARY ANTIMICROBIAL AGENTS. Environ Toxicol Chem 2007, 26, 601, doi:10.1897/06-195R.1.
[12]	Diaz, L.F. Pharmaceuticals in the Environment: Sources, Fate, Effects and Risks. Waste Management 2003, 23, 193, doi:10.1016/S0956-053X(02)00108-3.
[13]	Ebringer, L.; Krajčovič, J.; Polónyi, J.; Lahitová, N.; Doupovcová, M.; Dobias, J. Tetracycline Reduces Fluoroquinolones-Induced Bleaching of Euglena Gracilis. Mutation Research/Reviews in Genetic Toxicology 1996, 340, 141–149, doi:10.1016/S0165-1110(96)90045-7.
[14]	Lützhøft, H.-C.H.; Halling-Sørensen, B.; Jørgensen, S.E. Algal Toxicity of Antibacterial Agents Applied in Danish Fish Farming. Archives of Environmental Contamination and Toxicology 1999, 36, 1–6, doi:10.1007/s002449900435.
[15]	Wollenberger, L.; Halling-Sørensen, B.; Kusk, K.O. Acute and Chronic Toxicity of Veterinary Antibiotics to Daphnia Magna. Chemosphere 2000, 40, 723–730, doi:10.1016/S0045-6535(99)00443-9.
[16]	Zounková, R.; Klimešová, Z.; Nepejchalová, L.; Hilscherová, K.; Bláha, L. Complex Evaluation of Ecotoxicity and Genotoxicity of Antimicrobials Oxytetracycline and Flumequine Used in Aquaculture. Environmental Toxicology and Chemistry 2011, 30, 1184–1189, doi:10.1002/etc.486.
[17]	Divo, A.A.; Geary, T.G.; Jensen, J.B. Oxygen- and Time-Dependent Effects of Antibiotics and Selected Mitochondrial Inhibitors on Plasmodium Falciparum in Culturet. ANTIMICROB. AGENTS CHEMOTHER. 1985, 27, 7.
[18]	Guo, J.; Bai, Y.; Chen, Z.; Mo, J.; Li, Q.; Sun, H.; Zhang, Q. Transcriptomic Analysis Suggests the Inhibition of DNA Damage Repair in Green Alga Raphidocelis Subcapitata Exposed to Roxithromycin. Ecotoxicology and Environmental Safety 2020, 201, 110737, doi:10.1016/j.ecoenv.2020.110737.
[19]	Yang, L.-H.; Ying, G.-G.; Su, H.-C.; Stauber, J.L.; Adams, M.S.; Binet, M.T. Growth-Inhibiting Effects of 12 Antibacterial Agents and Their Mixtures on the Freshwater Microalga Pseudokirchneriella Subcapitata. Environmental Toxicology and Chemistry 2008, 27, 1201–1208, doi:10.1897/07-471.1.
[20]	Li, Y.; Ma, Y.; Yang, L.; Duan, S.; Zhou, F.; Chen, J.; Liu, Y.; Zhang, B. Effects of Azithromycin on Feeding Behavior and Nutrition Accumulation of Daphnia Magna under the Different Exposure Pathways. Ecotoxicology and Environmental Safety 2020, 197, 110573, doi:10.1016/j.ecoenv.2020.110573.
[21]	Nunes, B.; Antunes, S.C.; Gomes, R.; Campos, J.C.; Braga, M.R.; Ramos, A.S.; Correia, A.T. Acute Effects of Tetracycline Exposure in the Freshwater Fish Gambusia Holbrooki: Antioxidant Effects, Neurotoxicity and Histological Alterations. Arch Environ Contam Toxicol 2015, 11.
[22]	Zhu, Y.; Yang, D.; Duan, X.; Zhang, Y.; Chen, D.; Gong, Z.; Liu, C. Perfluorooctane Sulfonate Promotes Doxycycline-Induced Liver Tumor Progression in Male Kras Transgenic Zebrafish. Environmental Research 2021, 196, 110962, doi:10.1016/j.envres.2021.110962.
[23]	Baldisserotto, B.; Brinn, R.P.; R. Brandão, F.; C. Gomes, L.; Abreu, J.S.; McComb, D.M.; Marcon, J.L. Ion Flux and Cortisol Responses of Cardinal Tetra, Paracheirodon Axelrodi (Schultz, 1956), to Additives (Tetracycline, Tetracycline + Salt or Amquel ® ) Used during Transportation: Contributions to Amazonian Ornamental Fish Trade. J. Appl. Ichthyol. 2014, 30, 86–92, doi:10.1111/jai.12282.
[24]	Pascoe, D.; Karntanut, W.; Müller, C.T. Do Pharmaceuticals Affect Freshwater Invertebrates? A Study with the Cnidarian Hydra Vulgaris. Chemosphere 2003, 51, 521–528, doi:10.1016/S0045-6535(02)00860-3.
[25]	MacPhee, C.; Ruelle, R. Lethal Effects of 1888 Chemicals upon Four Species of Fish from Western North America 7. 58.
[26]	Inter-Laboratory Assessment of a Harmonized Zebrafish Developmental Toxicology Assay – Progress Report on Phase I. Reproductive Toxicology 2012, 10.
[27]	Reda, R.M.; Ibrahim, R.E.; Ahmed, E.-N.G.; El-Bouhy, Z.M. Effect of Oxytetracycline and Florfenicol as Growth Promoters on the Health Status of Cultured Oreochromis Niloticus. The Egyptian Journal of Aquatic Research 2013, 39, 241–248, doi:10.1016/j.ejar.2013.12.001.
[28]	Nandurkar,H.P., and S.P. Zambare. Effect of Tetracycline and Chloramphenicol on Protein Contents in Different Tissues of Freshwater Bivalve, Parreysia cylindrica (Annandale & Prashad)[J].Flora Fauna 2012, 18(2): 259-264.
[29]	Bin Zhu; Lei Liu; Yu-Xin Gong; Fei Ling; Gao-Xue Wang. Triazole-Induced Toxicity in Developing Rare Minnow (Gobiocypris Rarus)Embryos[J]. Environmental Science and Pollution Research, 2014, 21, 13625-13635.doi.org/10.1007/s11356-014-3317-6.
[30]	Shi, H.; Sun, Z.; Liu, Z.; Xue, Y. Effects of Clotrimazole and Amiodarone on Early Development of Amphibian ( Xenopus Tropicalis ). Toxicological & Environmental Chemistry 2012, 94, 128–135, doi:10.1080/02772248.2011.634643.
[31]	Giusti, A.; Ducrot, V.; Joaquim-Justo, C.; Lagadic, L. Testosterone Levels and Fecundity in the Hermaphroditic Aquatic Snail Lymnaea Stagnalis Exposed to Testosterone and Endocrine Disruptors: Testosterone and Endocrine Disruptors Affect Testosterone Levels in L. Stagnalis. Environ Toxicol Chem 2013, 32, 1740–1745, doi:10.1002/etc.2234.
[32]	Han, S.; Choi, K.; Kim, J.; Ji, K.; Kim, S.; Ahn, B.; Yun, J.; Choi, K.; Khim, J.S.; Zhang, X.; et al. Endocrine Disruption and Consequences of Chronic Exposure to Ibuprofen in Japanese Medaka (Oryzias Latipes) and Freshwater Cladocerans Daphnia Magna and Moina Macrocopa. Aquatic Toxicology 2010, 98, 256–264, doi:10.1016/j.aquatox.2010.02.013.
[33]	Nesbitt, R. Effects of Chronic Exposure to Ibuprofen and Naproxen on Florida Flagfish (Jordanella Floridae) over One Complete Life-Cycle. Environmental Science.153.
[34]	Steinkey, D.; Lari, E.; Woodman, S.G.; Luong, K.H.; Wong, C.S.; Pyle, G.G. Effects of Gemfibrozil on the Growth, Reproduction, and Energy Stores of Daphnia Magna in the Presence of Varying Food Concentrations. Chemosphere 2018, 192, 75–80, doi:10.1016/j.chemosphere.2017.10.124.
[35]	Zhang, X.; Gong, Z. Fluorescent Transgenic Zebrafish Tg(Nkx2.2a:mEGFP) Provides a Highly Sensitive Monitoring Tool for Neurotoxins. PLoS ONE 2013, 8, e55474, doi:10.1371/journal.pone.0055474.
[36]	Owen, S.F.; Huggett, D.B.; Hutchinson, T.H.; Hetheridge, M.J.; McCormack, P.; Kinter, L.B.; Ericson, J.F.; Constantine, L.A.; Sumpter, J.P. The Value of Repeating Studies and Multiple Controls: Replicated 28-Day Growth Studies of Rainbow Trout Exposed to Clofibric Acid. Environmental Toxicology and Chemistry 2010, 29, 2831–2839, doi:10.1002/etc.351.
[37]	Crago, J.; Klaper, R. Place-Based Screening of Mixtures of Dominant Emerging Contaminants Measured in Lake Michigan Using Zebrafish Embryo Gene Expression Assay. Chemosphere 2018, 193, 1226–1234, doi:10.1016/j.chemosphere.2017.11.043.
[38]	Bereketoglu, C.; Pradhan, A.; Olsson, P.-E. Nonsteroidal Anti-Inflammatory Drugs (NSAIDs) Cause Male-Biased Sex Differentiation in Zebrafish. Aquatic Toxicology 2020, 223, 105476, doi:10.1016/j.aquatox.2020.105476.
[39]	Rocco, L.; Frenzilli, G.; Fusco, D.; Peluso, C.; Stingo, V. Evaluation of Zebrafish DNA Integrity after Exposure to Pharmacological Agents Present in Aquatic Environments. Ecotoxicology and Environmental Safety 2010, 73, 1530–1536, doi:10.1016/j.ecoenv.2010.07.032.
[40]	Lister, A.L.; Van Der Kraak, G. An Investigation into the Role of Prostaglandins in Zebrafish Oocyte Maturation and Ovulation. General and Comparative Endocrinology 2008, 159, 46–57, doi:10.1016/j.ygcen.2008.07.017.
[41]	Triebskorn, R.; Casper, H.; Scheil, V.; Schwaiger, J. Ultrastructural Effects of Pharmaceuticals (Carbamazepine, Clofibric Acid, Metoprolol, Diclofenac) in Rainbow Trout (Oncorhynchus Mykiss) and Common Carp (Cyprinus Carpio). Anal Bioanal Chem 2007, 387, 1405–1416, doi:10.1007/s00216-006-1033-x.
[42]	Huggett, D.B.; Brooks, B.W.; Peterson, B.; Foran, C.M.; Schlenk, D. Toxicity of Select Beta Adrenergic Receptor-Blocking Pharmaceuticals (B-Blockers) on Aquatic Organisms. Arch. Environ. Contam. Toxicol. 2002, 43, 229–235, doi:10.1007/s00244-002-1182-7.
[43]	Parolini, M.; Quinn, B.; Binelli, A.; Provini, A. Cytotoxicity Assessment of Four Pharmaceutical Compounds on the Zebra Mussel (Dreissena Polymorpha) Haemocytes, Gill and Digestive Gland Primary Cell Cultures. Chemosphere 2011, 84, 91–100, doi:10.1016/j.chemosphere.2011.02.049.
[44]	Mennillo, E.; Pretti, C.; Cappelli, F.; Luci, G.; Intorre, L.; Meucci, V.; Arukwe, A. Novel Organ-Specific Effects of Ketoprofen and Its Enantiomer, Dexketoprofen on Toxicological Response Transcripts and Their Functional Products in Salmon. Aquatic Toxicology 2020, 229, 105677, doi:10.1016/j.aquatox.2020.105677.
[45]	British Library EThOS: The Effects of Contaminants on Various Life-Cycle Stages of Atlantic Salmon (Salmo Salar L.) Available online: https://ethos.bl.uk/OrderDetails.do?uin=uk.bl.ethos.486790 (accessed on 7 June 2022).
[46]	Passarelli, F.; Merante, A.; Pontieri, F.E.; Margotta, V.; Venturini, G.; Palladini, G. Opioid–Dopamine Interaction in Planaria: A Behavioral Study. Comparative Biochemistry and Physiology Part C: Pharmacology, Toxicology and Endocrinology 1999, 124, 51–55, doi:10.1016/S0742-8413(99)00048-1.
[47]	Galus, M.; Kirischian, N.; Higgins, S.; Purdy, J.; Chow, J.; Rangaranjan, S.; Li, H.; Metcalfe, C.; Wilson, J.Y. Chronic, Low Concentration Exposure to Pharmaceuticals Impacts Multiple Organ Systems in Zebrafish. Aquatic Toxicology 2013, 132–133, 200–211, doi:10.1016/j.aquatox.2012.12.021.
[48]	Cunha, E.; Machado, J. Parturition in Anodonta Cygnea Induced by Selective Serotonin Reuptake Inhibitors (SSRIs). Canadian Journal of Zoology 2011, 79, 95–100, doi:10.1139/z00-187.
[49]	Calleja, M.C.; Persoone, G.; Geladi, P. Comparative Acute Toxicity of the First 50 Multicentre Evaluation of In Vitro Cytotoxicity Chemicals to Aquatic Non-Vertebrates. Arch. Environ. Contam. Toxicol. 1994, 26, 69–78, doi:10.1007/BF00212796.
[50]	Oggier, D.M.; Weisbrod, C.J.; Stoller, A.M.; Zenker, A.K. Effects of Diazepam on Gene Expression and Link to Physiological Effects in Different Life Stages in Zebrafish Danio Rerio. 7.
[51]	Lebreton, M.; Sire, S.; Carayon, J.-L.; Malgouyres, J.-M.; Vignet, C.; Géret, F.; Bonnafé, E. Low Concentrations of Oxazepam Induce Feeding and Molecular Changes in Radix Balthica Juveniles. Aquatic Toxicology 2021, 230, 105694, doi:10.1016/j.aquatox.2020.105694.
[52]	Schoenfuss, H.L.; Furlong, E.T.; Phillips, P.J.; Scott, T.-M.; Kolpin, D.W.; Cetkovic-Cvrlje, M.; Lesteberg, K.E.; Rearick, D.C. Complex Mixtures, Complex Responses: Assessing Pharmaceutical Mixtures Using Field and Laboratory Approaches: Biological Effects of Complex Pharmaceutical Mixtures. Environ Toxicol Chem 2016, 35, 953–965, doi:10.1002/etc.3147.
[53]	Wilkinson, R.E.; Duncan, R.R. Seashore Paspalum (Paspalum Vaginatuh Swartz) Seminal Root Response to Calcium (45ca2+) Absorption m. 9.
[54]	Ayanda, O.; Oniye, S.; Auta, J.; Ajibola, V.; Bello, O. Responses of the African Catfish Clarias Gariepinus to Long-Term Exposure to Glyphosate- and Paraqua. 8.
[55]	Guk H Han, Hor G Hur, Sang D Kim, Ecotoxicological Risk of Pharmaceuticals from Wastewater Treatment Plants in Korea: Occurrence and Toxicity to Daphnia Magna. Environ Toxicol Chem.,2006,25(1),265-271.
[56]	Overturf, M.D.; Overturf, C.L.; Baxter, D.; Hala, D.N.; Constantine, L.; Venables, B.; Huggett, D.B. Early Life-Stage Toxicity of Eight Pharmaceuticals to the Fathead Minnow, Pimephales Promelas. Arch Environ Contam Toxicol 2012, 10.
[57]	Pruvot, B. A Panel of Biological Tests Reveals Developmental Effects of Pharmaceutical Pollutants on Late Stage Zebrafish Embryos. Reproductive Toxicology 2012, 34(4),568-583.
[58]	Zhang, X.; Hecker, M.; Jones, P.D.; Newsted, J.; Au, D.; Kong, R.; Wu, R.S.S.; Giesy, J.P. Responses of the Medaka HPG Axis PCR Array and Reproduction to Prochloraz and Ketoconazole. 8.

## Sheet: Table S6
Table S6 PNEC of EDCs.
No.	Name	Species	Endpoint	Concentration (mg/L)	AF	PNEC (ng/L)	Reference
1	Triclosan	Zebra Mussel	NOEC	0.00029	10	29	[1]
2	Nonylphenol	Oryzias latipes	NOEC	0.0001	10	10	[2]
3	Triclocarban	Daphnia magna	NOEC	0.00025	10	25	[3]
4	Octyl phenol	Valvata piscinalis	NOEC	0.001	10	100	[4]
5	Estrone	Oncorhynchus mykiss	NOEC	7.4e-07	10	0.074	[5]
6	β-Estradiol	Gobiocypris rarus	LOEC	5e-05	100	0.5	[6]
7	Ethinylestradiol	Danio rerio	NOEC	2.96409e-08	10	0.0029	[7]
8	Estriol	Oryzias latipes	NOEC	4.65e-05	100	0.47	[8]
9	Bisphenol-A	Pimephales promelas	LOEC	1.3e-05	5	2.65	[9]
10	Chloroform	Ictalurus punctatus	LC50	0.185	1000	185	[10]
11	Diethylstilbestrol	Lithobates pipiens	NOEC	0.001	10	100	[11]
12	p-t-Octylphenol	Lithobates pipiens	NOEC	2.06328e-06	10	0.21	[12]
13	Norethindrone	Danio rerio	NOEC	7e-06	100	0.007	[13]
References:
[1]	Parolini, M.; Pedriali, A.; Binelli, A. Application of a Biomarker Response Index for Ranking the Toxicity of Five Pharmaceutical and Personal Care Products (PPCPs) to the Bivalve Dreissena Polymorpha. Arch Environ Contam Toxicol 2013, 64, 439–447, doi:10.1007/s00244-012-9847-3.
[2]	Lee, W.; Kang, C.-W.; Su, C.-K.; Okubo, K.; Nagahama, Y. Screening Estrogenic Activity of Environmental Contaminants and Water Samples Using a Transgenic Medaka Embryo Bioassay. Chemosphere 2012, 88, 945–952, doi:10.1016/j.chemosphere.2012.03.024.
[3]	E.G. and G. Bionomics.Initial Submission: The Chronic Toxicity of 1218033 to the Water Flea Daphnia magna with Cover Letter Dated 081492,EPA/OTS Doc.#88-920007397:20 p.1992.
[4]	Gagnaire, B.; Gagné, F.; André, C.; Blaise, C.; Abbaci, K.; Budzinski, H.; Dévier, M.-H.; Garric, J. Development of Biomarkers of Stress Related to Endocrine Disruption in Gastropods: Alkali-Labile Phosphates, Protein-Bound Lipids and Vitellogenin-like Proteins. Aquatic Toxicology 2009, 92, 155–167, doi:10.1016/j.aquatox.2009.01.012.
[5]	Thorpe, K.L.; Cummings, R.I.; Hutchinson, T.H.; Scholze, M.; Brighty, G.; Sumpter, J.P.; Tyler, C.R. Relative Potencies and Combination Effects of Steroidal Estrogens in Fish. Environ. Sci. Technol. 2003, 37, 1142–1149, doi:10.1021/es0201348.
[6]	Zhang, X.; Xiong, L.; Liu, Y.; Deng, C.; Mao, S. Histopathological and Estrogen Effect of Pentachlorophenol on the Rare Minnow (Gobiocypris Rarus). Fish Physiol Biochem 2014, 40, 805–816, doi:10.1007/s10695-013-9887-2.
[7]	Kazeto, Y.; Place, A.R.; Trant, J.M. Effects of Endocrine Disrupting Chemicals on the Expression of CYP19 Genes in Zebrafish (Danio Rerio) Juveniles. Aquatic Toxicology 2004, 69, 25–34, doi:10.1016/j.aquatox.2004.04.008.
[8]	Lei, B.; Kang, J.; Yu, Y.; Zha, J.; Li, W.; Wang, Z.; Wang, Y.; Wen, Y. Long-Term Exposure Investigating the Estrogenic Potency of Estriol in Japanese Medaka (Oryzias Latipes). Comparative Biochemistry and Physiology Part C: Toxicology & Pharmacology 2014, 160, 86–92, doi:10.1016/j.cbpc.2013.11.001.
[9]	Villeneuve, D.L.; Garcia-Reyero, N.; Escalon, B.L.; Jensen, K.M.; Cavallin, J.E.; Makynen, E.A.; Durhan, E.J.; Kahl, M.D.; Thomas, L.M.; Perkins, E.J.; et al. Ecotoxicogenomics to Support Ecological Risk Assessment: A Case Study with Bisphenol A in Fish. Environ. Sci. Technol. 2012, 46, 51–59, doi:10.1021/es201150a.
[10]	Bean, R.M.; Gibson, C.I.; Anderson, D.R. Biocide By-Products in Aquatic Environments: Final Report, September 10, 1976-September 30, 1979; NUREG/CR; U.S. Nuclear Regulatory Commission: Washington, D.C., 1981;
[11]	Selcer, K.W.; Verbanic, J.D. Vitellogenin of the Northern Leopard Frog (Rana Pipiens): Development of an ELISA Assay and Evaluation of Induction after Immersion in Xenobiotic Estrogens. Chemosphere 2014, 112, 348–354, doi:10.1016/j.chemosphere.2014.04.073.
[12]	Croteau, M.C.; Davidson, M.; Duarte-Guterman, P.; Wade, M.; Popesku, J.T.; Wiens, S.; Lean, D.R.S.; Trudeau, V.L. Assessment of Thyroid System Disruption in Rana Pipiens Tadpoles Chronically Exposed to UVB Radiation and 4-Tert-Octylphenol. Aquatic Toxicology 2009, 95, 81–92, doi:10.1016/j.aquatox.2009.05.013.
[13]	Liang, Y.-Q.; Xu, W.; Liang, X.; Jing, Z.; Pan, C.-G.; Tian, F. The Synthetic Progestin Norethindrone Causes Thyroid Endocrine Disruption in Adult Zebrafish. Comparative Biochemistry and Physiology Part C: Toxicology & Pharmacology 2020, 236, 108819, doi:10.1016/j.cbpc.2020.108819.

## Sheet: Table S7
Table S7 Chronic toxicity data of Carbamazepine on freshwater organisms.
Phylum	Family	Species	Endpoint	Effect	CVE (mg/L)	Reference
Chlorophyta	Scenedesmaceae	acutus	MATC	Enzyme(s)	2.24	[1]
	Oocystaceae	pyrenoidosa	MATC	Population	2.24	[1]
Arthropoda	Chironomidae	riparius	MATC	Development	0.23	[2]
	Chydoridae	sp.	NOEC	Population	0.002	[3]
	Daphniidae	sp.	NOEC	Population	0.002	[3]
	Daphniidae	dubia	EC20	Reproduction	0.15	[4]
Mollusca	Hydrobiidae	antipodarum	LOEC	Accumulation	3.7e-05	[5]
	Corbiculidae	fluminea	MATC	Genetics	0.001	[6]
	Pleuroceridae	livescens	NOEC	Population	0.002	[3]
	Physidae	acuta	MATC	Population	0.002	[3]
	Planorbidae	trivolvis	NOEC	Population	0.002	[3]
	Lymnaeidae	stagnalis	NOEC	Population	0.002	[3]
Chordata	Limnodynastidae	peronii	NOEC	Development	0.01	[7]
	Cyprinidae	carpio	MATC	Histology	0.032	[8]
	Cyprinidae	rarus	MATC	Genetics	0.0096	[9]
	Cyprinidae	rerio	MATC	Reproduction	0.011	[10]
	Cyprinidae	promelas	NOEC	Growth	0.86	[11]
	Salmonidae	mykiss	MATC	Enzyme(s)	0.013	[12]
Magnoliophyta	Magnoliophyta	sp.	MATC	Enzyme(s)	1.41	[13]
References:
[1]	Zhang, W.; Zhang, M.; Lin, K.; Sun, W.; Xiong, B.; Guo, M.; Cui, X.; Fu, R. Eco-Toxicological Effect of Carbamazepine on Scenedesmus Obliquus and Chlorella Pyrenoidosa. Environmental Toxicology and Pharmacology 2012, 33, 344–352, doi:10.1016/j.etap.2011.12.024.
[2]	Oetken, M.; Nentwig, G.; Löffler, D.; Ternes, T.; Oehlmann, J. Effects of Pharmaceuticals on Aquatic Invertebrates. Part I. The Antiepileptic Drug Carbamazepine. Arch Environ Contam Toxicol 2005, 49, 353–361, doi:10.1007/s00244-004-0211-0.
[3]	Jarvis, A.L.; Bernot, M.J.; Bernot, R.J. The Effects of the Psychiatric Drug Carbamazepine on Freshwater Invertebrate Communities and Ecosystem Dynamics. Science of The Total Environment 2014, 496, 461–470, doi:10.1016/j.scitotenv.2014.07.084.
[4]	Lamichhane, K.; Garcia, S.N.; Huggett, D.B.; DeAngelis, D.L.; La Point, T.W. Chronic Effects of Carbamazepine on Life-History Strategies of Ceriodaphnia Dubia in Three Successive Generations. Arch Environ Contam Toxicol 2013, 64, 427–438, doi:10.1007/s00244-012-9845-5.
[5]	Gust, M.; Gagné, F.; Berlioz-Barbier, A.; Besse, J.P.; Buronfosse, T.; Tournier, M.; Tutundjian, R.; Garric, J.; Cren-Olivé, C. Caged Mudsnail Potamopyrgus Antipodarum (Gray) as an Integrated Field Biomonitoring Tool: Exposure Assessment and Reprotoxic Effects of Water Column Contamination. Water Research 2014, 54, 222–236, doi:10.1016/j.watres.2014.01.057.
[6]	Chen, H.; Zha, J.; Liang, X.; Li, J.; Wang, Z. Effects of the Human Antiepileptic Drug Carbamazepine on the Behavior, Biomarkers, and Heat Shock Proteins in the Asian Clam Corbicula Fluminea. Aquatic Toxicology 2014, 155, 1–8, doi:10.1016/j.aquatox.2014.06.001.
[7]	Melvin, S.D.; Cameron, M.C.; Lanctôt, C.M. Individual and Mixture Toxicity of Pharmaceuticals Naproxen, Carbamazepine, and Sulfamethoxazole to Australian Striped Marsh Frog Tadpoles (Limnodynastes Peronii). Journal of Toxicology and Environmental Health, Part A 2014, 77, 337–345, doi:10.1080/15287394.2013.865107.
[8]	Triebskorn, R.; Casper, H.; Scheil, V.; Schwaiger, J. Ultrastructural Effects of Pharmaceuticals (Carbamazepine, Clofibric Acid, Metoprolol, Diclofenac) in Rainbow Trout (Oncorhynchus Mykiss) and Common Carp (Cyprinus Carpio). Anal Bioanal Chem 2007, 387, 1405–1416, doi:10.1007/s00216-006-1033-x.
[9]	Yan, S.; Chen, R.; Wang, M.; Zha, J. Carbamazepine at Environmentally Relevant Concentrations Caused DNA Damage and Apoptosis in the Liver of Chinese Rare Minnows (Gobiocypris Rarus) by the Ras/Raf/ERK/P53 Signaling Pathway. Environmental Pollution 2021, 270, 116245, doi:10.1016/j.envpol.2020.116245.
[10]	Fraz, S.; Lee, A.H.; Wilson, J.Y. Gemfibrozil and Carbamazepine Decrease Steroid Production in Zebrafish Testes (Danio Rerio). Aquatic Toxicology 2018, 198, 1–9, doi:10.1016/j.aquatox.2018.02.006.
[11]	Overturf, M.D.; Overturf, C.L.; Baxter, D.; Hala, D.N.; Constantine, L.; Venables, B.; Huggett, D.B. Early Life-Stage Toxicity of Eight Pharmaceuticals to the Fathead Minnow, Pimephales Promelas. Arch Environ Contam Toxicol 2012, 62, 455–464, doi:10.1007/s00244-011-9723-6.
[12]	Li, Z.-H.; Velisek, J.; Zlabek, V.; Grabic, R.; Machova, J.; Kolarova, J.; Randak, T. Hepatic Antioxidant Status and Hematological Parameters in Rainbow Trout, Oncorhynchus Mykiss, after Chronic Exposure to Carbamazepine. Chemico-Biological Interactions 2010, 183, 98–104, doi:10.1016/j.cbi.2009.09.009.
[13]	Dordio, A.V.; Belo, M.; Martins Teixeira, D.; Palace Carvalho, A.J.; Dias, C.M.B.; Picó, Y.; Pinto, A.P. Evaluation of Carbamazepine Uptake and Metabolization by Typha Spp., a Plant with Potential Use in Phytotreatment. Bioresource Technology 2011, 102, 7827–7834, doi:10.1016/j.biortech.2011.06.050.

## Sheet: Table S8
Table S8 Acute toxicity data of Carbamazepine on freshwater organisms.
Phylum	Family	Species	Endpoint	Effect	AVE (mg/L)	Reference
Chlorophyta	Oocystaceae	pyrenoidosa	EC50	Population	49.4	[1]
	Oocystaceae	vulgaris	EC50	Population	36.62	[2]
	Scenedesmaceae	subspicatus	EC50	Population	74	[3]
	Dunaliellaceae	tertiolecta	EC50	Population	80	[4]
	Scenedesmaceae	acutus	EC50	Population	70.1	[1]
Arthropoda	Daphniidae	magna	EC50	Intoxication	97.82	[2]
	Daphniidae	dubia	EC50	Intoxication	7.07	[5]
Chordata	Pipidae	laevis	EC50	Development	100	[6]
	Adrianichthyidae	latipes	LC50	Mortality	35.4	[7]
	Limnodynastidae	peronii	EC50	Intoxication	65.7	[8]
	Cyprinidae	rerio	EC50	Development	52.45	[9]
	Salmonidae	mykiss	LC50	Mortality	19.9	[10]
Cnidaria	Hydridae	vulgaris	EC50	Mortality	3.76	[11]
References:
[1]	Zhang, W.; Zhang, M.; Lin, K.; Sun, W.; Xiong, B.; Guo, M.; Cui, X.; Fu, R. Eco-Toxicological Effect of Carbamazepine on Scenedesmus Obliquus and Chlorella Pyrenoidosa. Environmental Toxicology and Pharmacology 2012, 33, 344–352, doi:10.1016/j.etap.2011.12.024.
[2]	Jos, A.; Repetto, G.; Rios, J.C.; Hazen, M.J.; Molero, M.L.; del Peso, A.; Salguero, M.; Fernández-Freire, P.; Pérez-Martı́n, J.M.; Cameán, A. Ecotoxicological Evaluation of Carbamazepine Using Six Different Model Systems with Eighteen Endpoints. Toxicology in Vitro 2003, 17, 525–532, doi:10.1016/S0887-2333(03)00119-X.
[3]	Cleuvers, M. Aquatic Ecotoxicity of Pharmaceuticals Including the Assessment of Combination Effects. Toxicology Letters 2003, 142, 185–194, doi:10.1016/S0378-4274(03)00068-7.
[4]	DeLorenzo, M.E.; Fleming, J. Individual and Mixture Effects of Selected Pharmaceuticals and Personal Care Products on the Marine Phytoplankton Species Dunaliella Tertiolecta. Arch Environ Contam Toxicol 2008, 54, 203–210, doi:10.1007/s00244-007-9032-2.
[5]	Lamichhane, K.; Garcia, S.N.; Huggett, D.B.; DeAngelis, D.L.; La Point, T.W. Chronic Effects of Carbamazepine on Life-History Strategies of Ceriodaphnia Dubia in Three Successive Generations. Arch Environ Contam Toxicol 2013, 64, 427–438, doi:10.1007/s00244-012-9845-5.
[6]	Richards, S.M.; Cole, S.E. A Toxicity and Hazard Assessment of Fourteen Pharmaceuticals to Xenopus Laevis Larvae. Ecotoxicology 2006, 15, 647–656, doi:10.1007/s10646-006-0102-4.
[7]	Kim, Y.; Choi, K.; Jung, J.; Park, S.; Kim, P.-G.; Park, J. Aquatic Toxicity of Acetaminophen, Carbamazepine, Cimetidine, Diltiazem and Six Major Sulfonamides, and Their Potential Ecological Risks in Korea. Environment International 2007, 33, 370–375, doi:10.1016/j.envint.2006.11.017.
[8]	Melvin, S.D.; Cameron, M.C.; Lanctôt, C.M. Individual and Mixture Toxicity of Pharmaceuticals Naproxen, Carbamazepine, and Sulfamethoxazole to Australian Striped Marsh Frog Tadpoles (Limnodynastes Peronii). Journal of Toxicology and Environmental Health, Part A 2014, 77, 337–345, doi:10.1080/15287394.2013.865107.
[9]	Weigt, S.; Huebler, N.; Strecker, R.; Braunbeck, T.; Broschard, T.H. Zebrafish (Danio Rerio) Embryos as a Model for Testing Proteratogens. Toxicology 2011, 281, 25–36, doi:10.1016/j.tox.2011.01.004.
[10]	Li, Z.-H.; Zlabek, V.; Velisek, J.; Grabic, R.; Machova, J.; Kolarova, J.; Li, P.; Randak, T. Acute Toxicity of Carbamazepine to Juvenile Rainbow Trout (Oncorhynchus Mykiss): Effects on Antioxidant Responses, Hematological Parameters and Hepatic EROD. Ecotoxicology and Environmental Safety 2011, 74, 319–327, doi:10.1016/j.ecoenv.2010.09.008.
[11]	Quinn, B.; Gagné, F.; Blaise, C. An Investigation into the Acute and Chronic Toxicity of Eleven Pharmaceuticals (and Their Solvents) Found in Wastewater Effluent on the Cnidarian, Hydra Attenuata. Science of The Total Environment 2008, 389, 306–314, doi:10.1016/j.scitotenv.2007.08.038.

## Sheet: Table S9
Table S9 Chronic toxicity data of ibuprofen on freshwater organisms
Phylum	Family	Species	Endpoint	Effect	CVE (mg/L)	Reference
Cyanophycota	Chroococcaceae	aeruginosa	NOEC	Population	0.2	[1]
Magnoliophyta	Lemnaceae	minor	EC50	Population	18.5	[2]
Arthropoda	Daphniidae	magna	MATC	Reproduction	6.41	[3]
Chordata	Cyprinidae	rerio	NOEC	Genetics	6.6e-05	[4]
	Adrianichthyidae	latipes	MATC	Reproduction	0.01	[5]
	Cyprinidae	promelas	MATC	Growth	0.68	[6]
	Cyprinidae	mrigala	LOEC	Biochemistry	14.2	[7]
Mollusca	Planorbidae	carinatus	MATC	Growth	1.57	[8]
Cnidaria	Hydridae	vulgaris	NOEC	Feeding behavior	10	[9]
Magnoliophyta	Magnoliophyta	sp.	MATC	Growth	0.71	[10]
References:
[1]	Ceballos-Laita, L.; Calvo, L.; Bes, M.; Fillat, M.; Peleato, M. Effects of Benzene and Several Pharmaceuticals on the Growth and Microcystin Production in Microcystis Ruginosa PCC 7806. Limnetica 2015, 34, 237–246, doi:10.23818/limn.34.19.
[2]	Kaza, M.; Nałącz-Jawecki, G.; Sawicki, J. The Toxicity of Selected Pharmaceuticals to the Aquatic Plant Lemna Minor. Fresenius Environmental Bulletin 2007, 16, 524–531.
[3]	Han, S.; Choi, K.; Kim, J.; Ji, K.; Kim, S.; Ahn, B.; Yun, J.; Choi, K.; Khim, J.S.; Zhang, X.; et al. Endocrine Disruption and Consequences of Chronic Exposure to Ibuprofen in Japanese Medaka (Oryzias Latipes) and Freshwater Cladocerans Daphnia Magna and Moina Macrocopa. Aquatic Toxicology 2010, 98, 256–264, doi:10.1016/j.aquatox.2010.02.013.
[4]	Rocco, L.; Frenzilli, G.; Fusco, D.; Peluso, C.; Stingo, V. Evaluation of Zebrafish DNA Integrity after Exposure to Pharmacological Agents Present in Aquatic Environments. Ecotoxicology and Environmental Safety 2010, 73, 1530–1536, doi:10.1016/j.ecoenv.2010.07.032.
[5]	Flippin, J.L.; Huggett, D.; Foran, C.M. Changes in the Timing of Reproduction Following Chronic Exposure to Ibuprofen in Japanese Medaka, Oryzias Latipes. Aquatic Toxicology 2007, 81, 73–78, doi:10.1016/j.aquatox.2006.11.002.
[6]	Overturf, M.D.; Overturf, C.L.; Baxter, D.; Hala, D.N.; Constantine, L.; Venables, B.; Huggett, D.B. Early Life-Stage Toxicity of Eight Pharmaceuticals to the Fathead Minnow, Pimephales Promelas. Arch Environ Contam Toxicol 2012, 62, 455–464, doi:10.1007/s00244-011-9723-6.
[7]	Saravanan, M.; Devi, K.U.; Malarvizhi, A.; Ramesh, M. Effects of Ibuprofen on Hematological, Biochemical and Enzymological Parameters of Blood in an Indian Major Carp, Cirrhinus Mrigala. Environmental Toxicology and Pharmacology 2012, 34, 14–22, doi:10.1016/j.etap.2012.02.005.
[8]	Pounds, N.; Maclean, S.; Webley, M.; Pascoe, D.; Hutchinson, T. Acute and Chronic Effects of Ibuprofen in the Mollusc Planorbis Carinatus (Gastropoda: Planorbidae). Ecotoxicology and Environmental Safety 2008, 70, 47–52, doi:10.1016/j.ecoenv.2007.07.003.
[9]	Pascoe, D.; Karntanut, W.; Müller, C.T. Do Pharmaceuticals Affect Freshwater Invertebrates? A Study with the Cnidarian Hydra Vulgaris. Chemosphere 2003, 51, 521–528, doi:10.1016/S0045-6535(02)00860-3.
[10]	Dordio, A.; Ferro, R.; Teixeira, D.; Carvalho, A.; Pinto, A.; Dias, C. Study on the Use of Typha Spp. for the Phytotreatment of Water Contaminated with Ibuprofen. Intern. J. Environ. Anal. Chem. 2011, 91, 654–667, doi:10.1080/03067311003782708.

[truncated: 4 more sheets: Table S10, Table S11, Table S12, Table S13]
